# Supplementary material
Source: publisher figshare collection journal article supplement (https://sage.figshare.com/ndownloader/files/23881951)
Supplement: Supplementary file 1 [file 23881951]

**ASSESSMENT FOR EFFECTIVE INTERVENTION SUPPLEMENTAL FILE**

**Table S3.** The List of Items in the Four Parallel MIA Test Forms

**ARTICLE TITLE**: Development and Validation of the Minnesota Inference Assessment

| **Form 1** | | **Form 2** | | **Form 3** | | **Form 4** | |
| --- | --- | --- | --- | --- | --- | --- | --- |
| Module | Item | Module | Item | Module | Item | Module | Item |
| Granny’s Glasses | 1 | Granny’s Glasses | 3 | Apple Thieves | 1 | Apple Thieves | 6 |
| Granny’s Glasses | 2 | Granny’s Glasses | 6 | Apple Thieves | 2 | Apple Thieves | 8 |
| Granny’s Glasses | 4 | Granny’s Glasses | 9 | Apple Thieves | 3 | Apple Thieves | 9 |
| Granny’s Glasses | 5 | Granny’s Glasses | 10 | Apple Thieves | 4 | Apple Thieves | 10 |
| Granny’s Glasses | 7 | Granny’s Glasses | 11 | Apple Thieves | 5 | Apple Thieves | 11 |
| Granny’s Glasses | 8 | Granny’s Glasses | 14 | Apple Thieves | 7 | Apple Thieves | 13 |
| Granny’s Glasses | 12 | Granny’s Glasses | 15 | Apple Thieves | 12 | Apple Thieves | 14 |
| Granny’s Glasses | 13 | Granny’s Glasses | 16 | Apple Thieves | 16 | Apple Thieves | 15 |
| Eagles | 1 | Eagles | 2 | Cephalopods | 1 | Cephalopods | 4 |
| Eagles | 3 | Eagles | 4 | Cephalopods | 2 | Cephalopods | 6 |
| Eagles | 5 | Eagles | 8 | Cephalopods | 3 | Cephalopods | 7 |
| Eagles | 6 | Eagles | 9 | Cephalopods | 5 | Cephalopods | 9 |
| Eagles | 7 | Eagles | 11 | Cephalopods | 8 | Cephalopods | 10 |
| Eagles | 10 | Eagles | 13 | Cephalopods | 13 | Cephalopods | 11 |
| Eagles | 12 | Eagles | 15 | Cephalopods | 15 | Cephalopods | 12 |
| Eagles | 14 | Eagles | 16 | Cephalopods | 16 | Cephalopods | 14 |
